# Supplementary material for: Diverse continuous photooxygenation reactions of (+) and (−)-α-pinenes to the corresponding pinocarvones or trans-pinocarveols
Source: Royal Society of Chemistry journal article supplement (doi:10.1039/d2re00385f), 2022-12-05
Supplement: d2re00385f1.pdf [file d2re00385f1.pdf]

## Supplementary Information (SI)

### Diverse Continuous Photooxygenation Reactions of (+) and (-)- $\alpha$ - Pinenes to the Corresponding Pinocarvones or trans- Pinocarveols

Gabriel H. S. Rosa,<sup>a§</sup> Thiago I. S. Santos,<sup>a§</sup> Timothy J. Brocksom<sup>a</sup> and Kleber T. de Oliveira\*<sup>a</sup>

<sup>a</sup> Departamento de Química, Universidade Federal de São Carlos, São Carlos, SP 13565-905, Brazil.

Email: kleber.oliveira@ufscar.br

<sup>§</sup> These authors contributed equally.

### Table of Contents

|                                                           |  |
|-----------------------------------------------------------|--|
| <b>1. Complementary General Information</b> .....         |  |
| <b>a. Batch photoreactor construction</b> .....           |  |
| <b>b. Continuous Flow photoreactor construction</b> ..... |  |
| <b>c. Tube-in-tube reactor</b> .....                      |  |
| <b>2. Bath results - setup S1</b> .....                   |  |
| 3. Flow setup S1.....                                     |  |
| 4. Flow Setup S2 .....                                    |  |
| 5. Flow setup S3.....                                     |  |
| 6. NMR Spectra.....                                       |  |
| 7. Reference .....                                        |  |

## 1. Complementary General Information

The CG-MS yields were determined in a SHIMADZU equipment: GCMS-QP5000 and GC17A using argon as gas (column 30 m, NA-5 MS XIL – 0.25 mm, 0.25  $\mu\text{m}$  – Bonded T max: 330-350  $^{\circ}\text{C}$ ): samples were prepared in ethyl acetate; injection temperature 250 $^{\circ}\text{C}$ , injection split ratio 19, carrier gas He, pressure 100 KPa, and column flow rate 1.3 mL/min; oven temperature setting was 100 $^{\circ}\text{C}$  for 5 min, heated at 15  $^{\circ}\text{C}\cdot\text{min}^{-1}$  to 150 $^{\circ}\text{C}$ , then heated at 7.5  $^{\circ}\text{C}\cdot\text{min}^{-1}$  to 220  $^{\circ}\text{C}$ , and finally heated at 10  $^{\circ}\text{C}\cdot\text{min}^{-1}$  to 280  $^{\circ}\text{C}$  and held for 7 min. Conversion percentages were analysed on the basis of chromatogram areas, with mass ion source temperature 250 $^{\circ}\text{C}$ , interface temperature 280 $^{\circ}\text{C}$ , and solvent cut time 5 min. The standard curve was constructed for the measured product, and quantifications were performed using dodecane as an internal standard.

Continuous-flow experiments were performed using Syrris equipment (Asia modules): two channels of a syringe pump (500 and 1000  $\mu\text{L}$ ), a KNAUER HPLC pump (AZURA P 4.1S), and a microchip reactor (250  $\mu\text{L}$ ). Two back-pressure regulators (BPR with pressures as specified). For pumping the  $\text{Ph}_3\text{P}$  solution, a Peristaltic Pump (New Era, model NE-9004C) was used.

### a. Batch photoreactor construction

Details on the construction of this photoreactor can be obtained in our previous publication,<sup>1,2</sup> and pictures of the steps and materials are presented in Figures S1-S2.

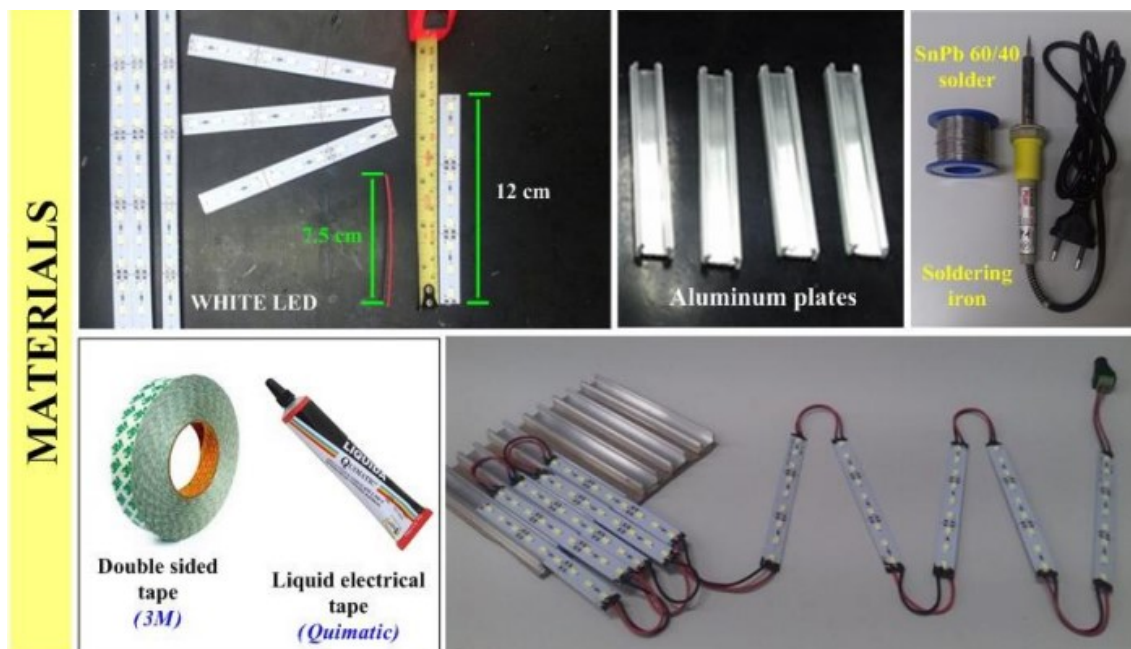

Figure S1. Materials used in the batch photoreactor.

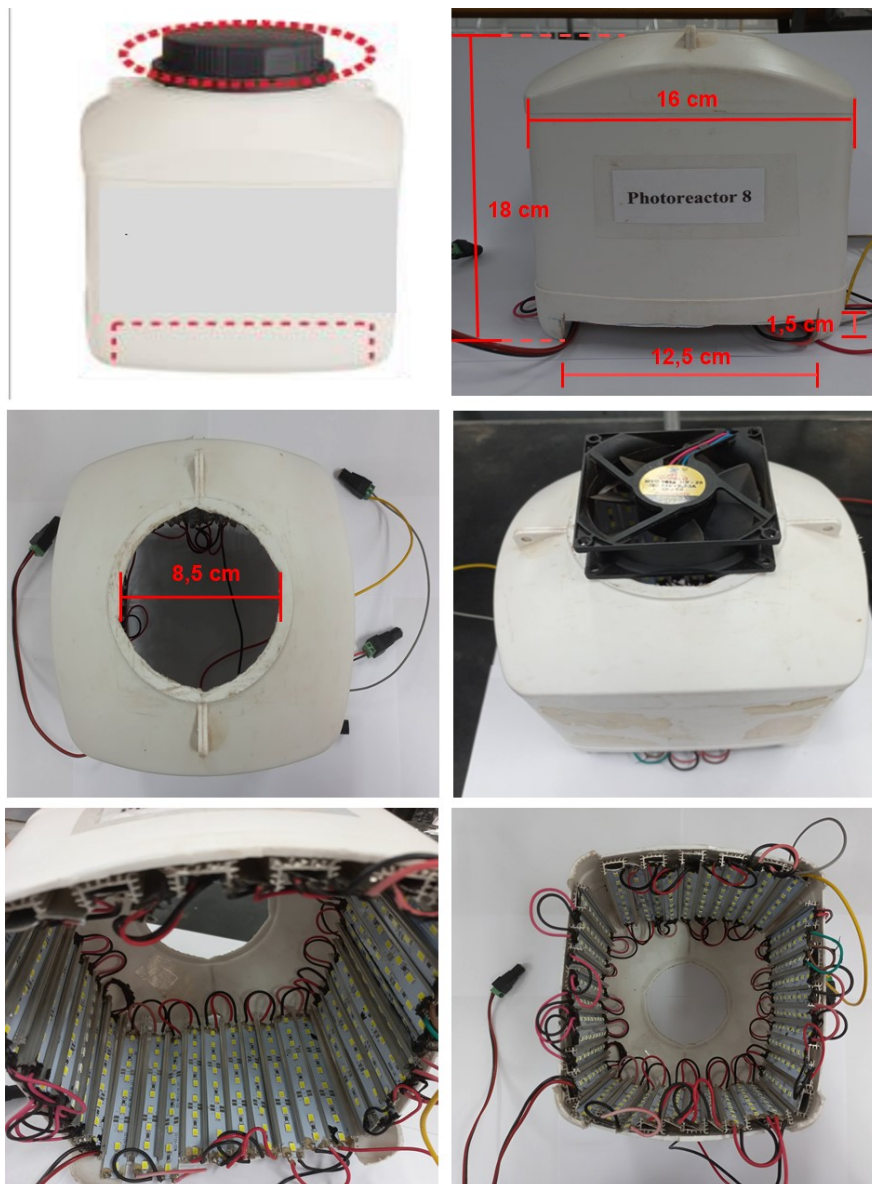

**Figure S2.** Step-by-Step of Batch photoreactor assembly.

### b. Continuous Flow photoreactor construction

Details on the construction of this photoreactor can be obtained in our previous publication,<sup>1,2</sup> and pictures of the steps and materials are presented in Figures S3.

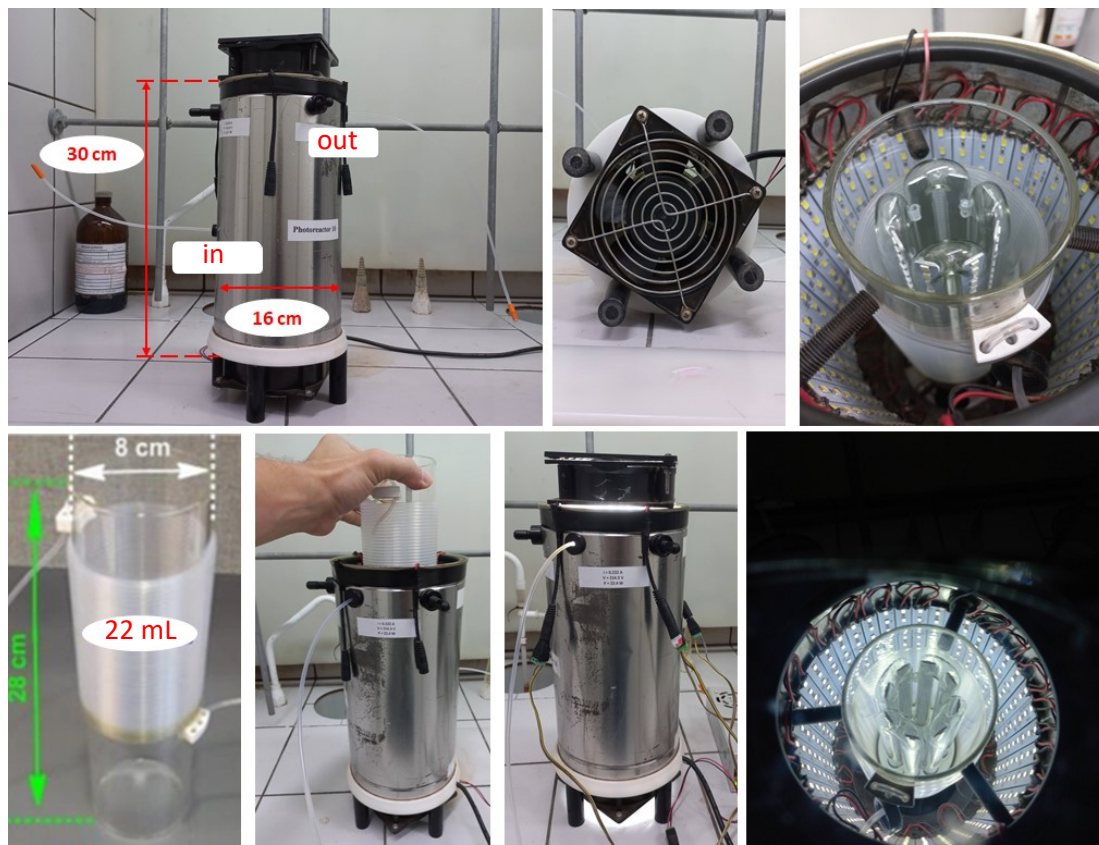

**Figure S3.** Final assembly of the photoreactor and PFA tubular reactor for continuous flow synthesis.

### c. Tube-in-tube reactor

The tube-in-tube (TIT) reactor used to oxygenate the solutions was constructed in our lab, based on the model by the Ley group<sup>3</sup>. Details of the construction of this reactor can be obtained in our previous work,<sup>1,2</sup> and pictures of the steps and materials are presented in Figures-S4.



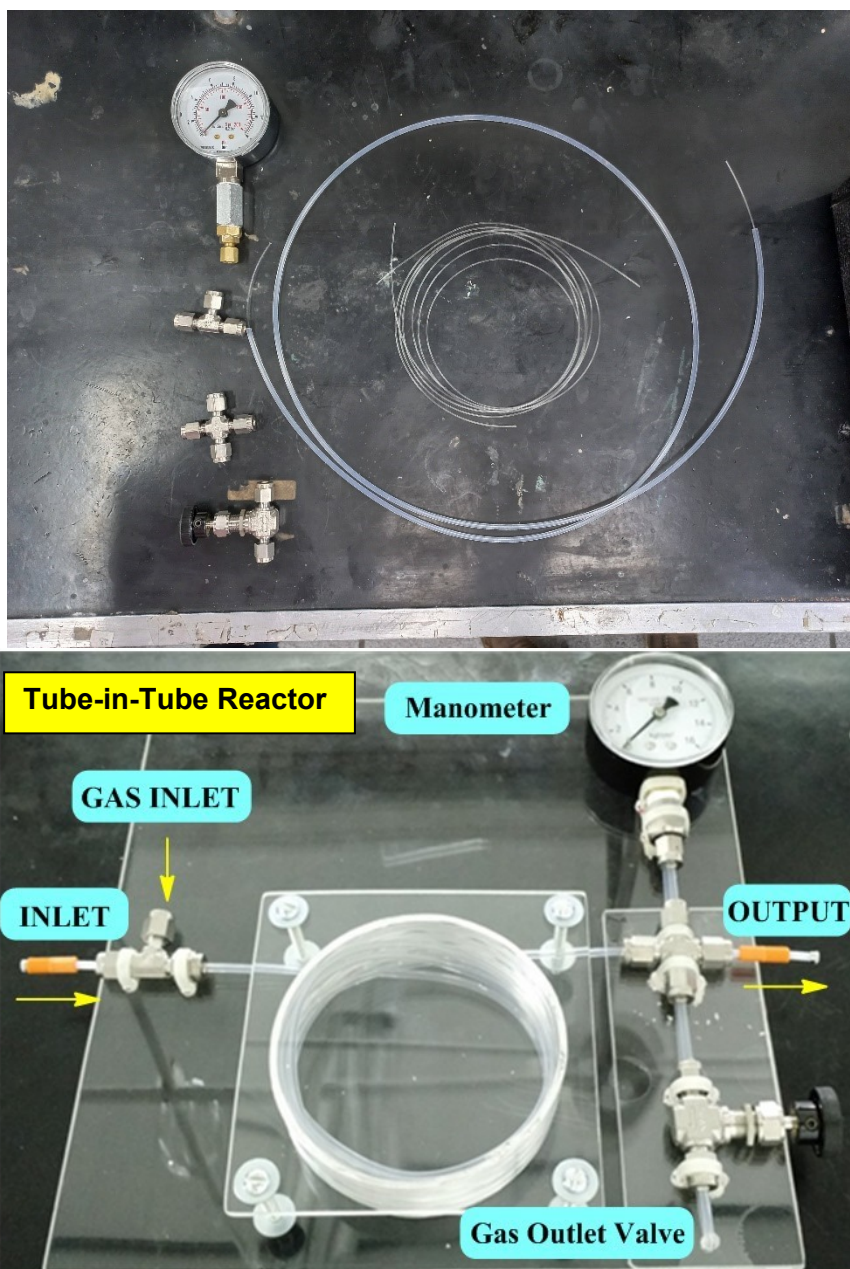

Figure S4. Our home-made tube-in-tube reactor.

## 2. Batch results - setup S1

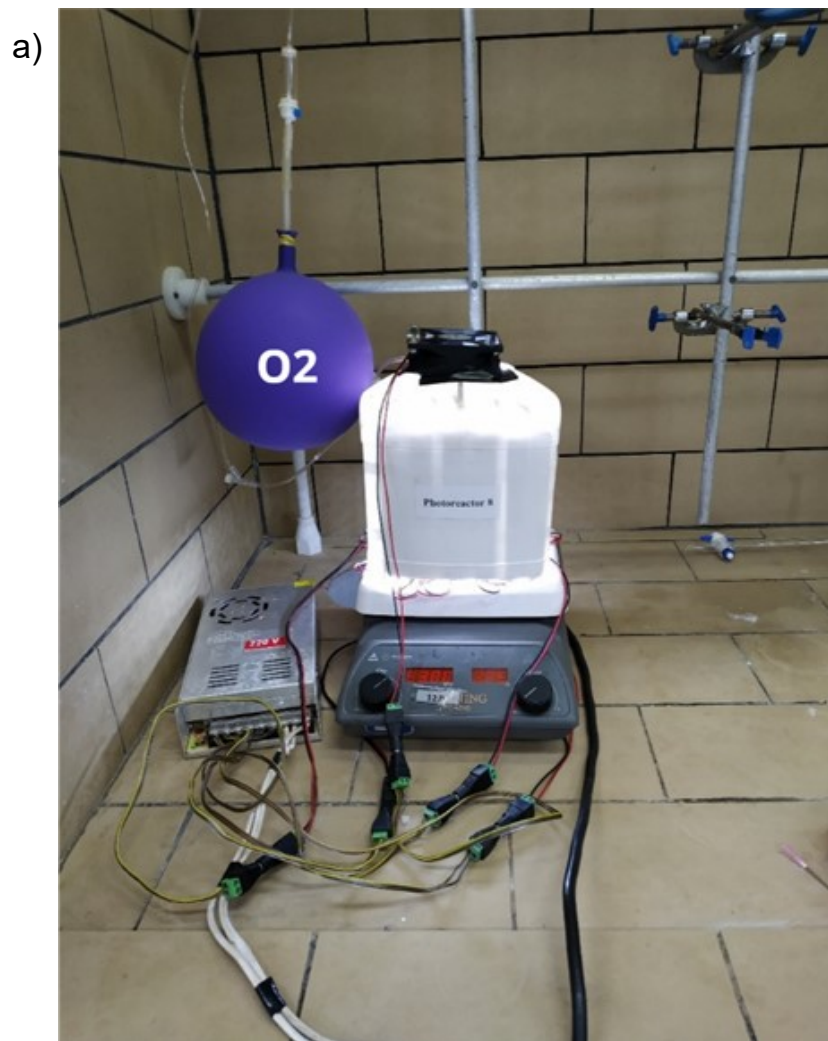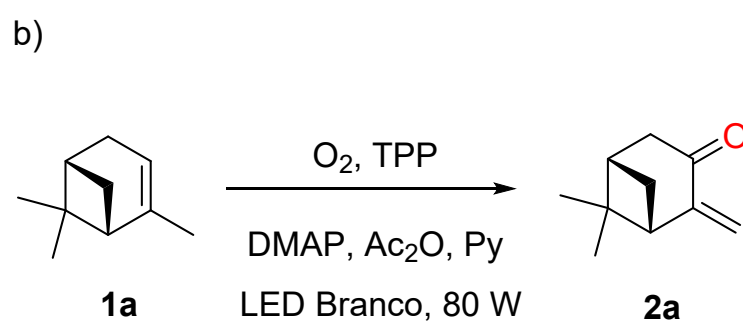

**Figure S5** – a) Batch setup reactor for the synthesis of (-)-pinocarvone. b) Conversion of (+)- $\alpha$ -pinene into (-)-pinocarvone.

### 3. Flow setup S1

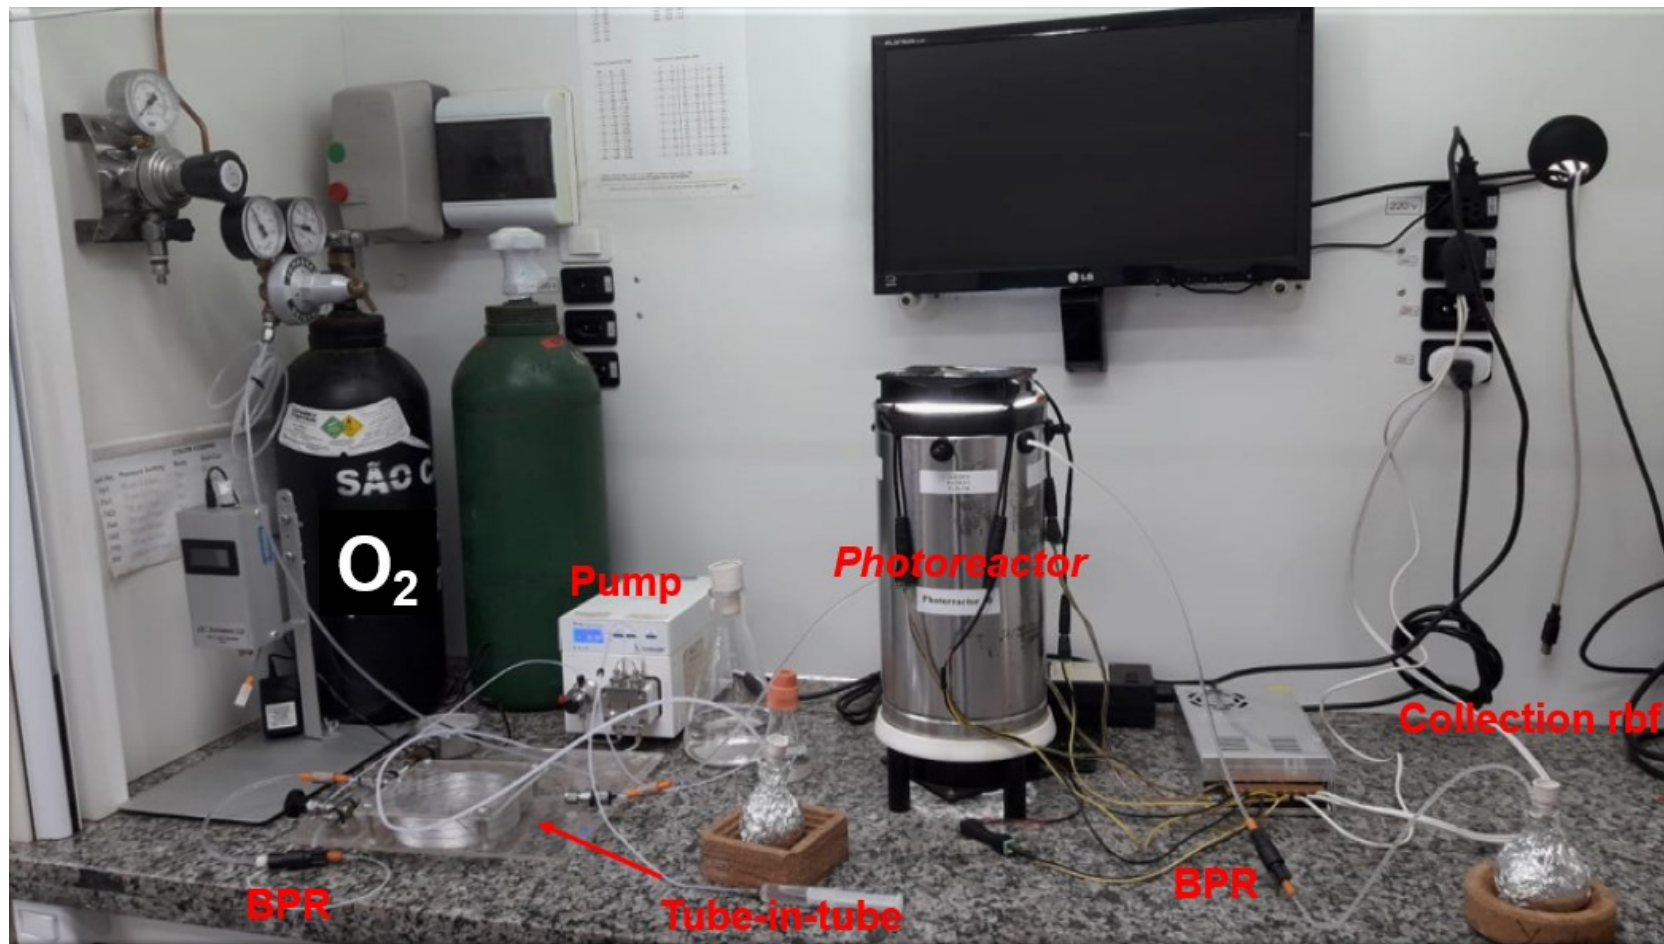

Figure S6 - Flow setup 1 for the synthesis of (-)-pinocarvone (2a).



#### 4. Flow Setup S2

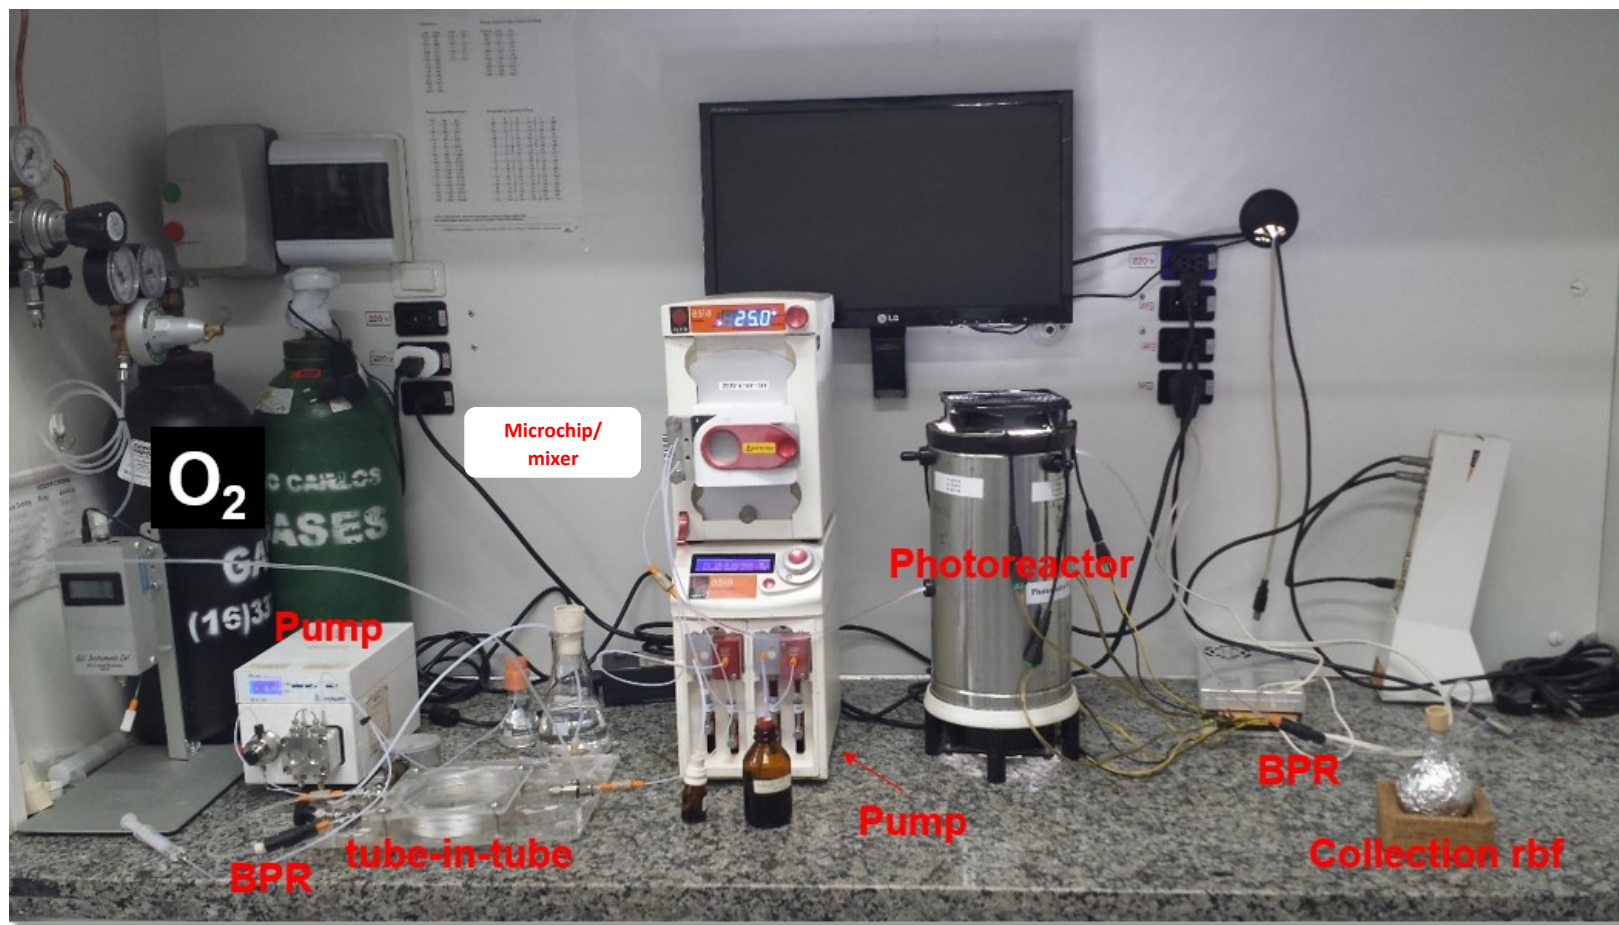

Figure S7 – Flow setup 2 for the synthesis of pinocarvones (2a-b)

## Flow setup S3

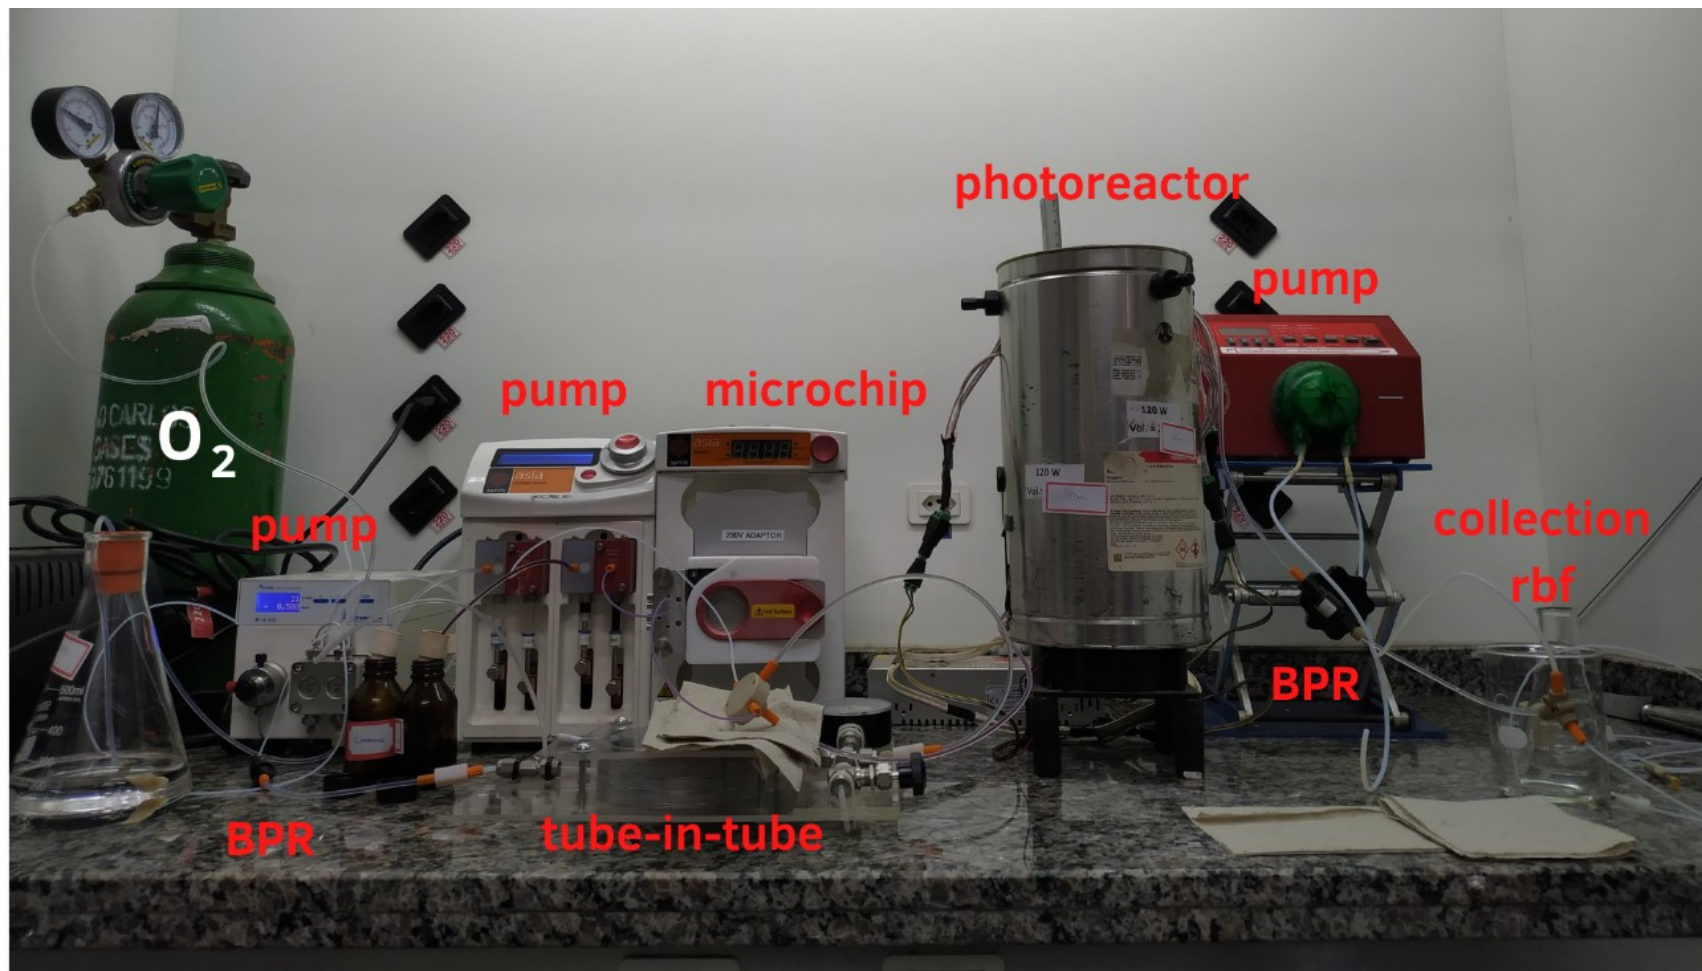

Figure S8 - Flow setup 3 for the synthesis of the trans-pinocarveols (3a-b)..

# 5. NMR Spectra

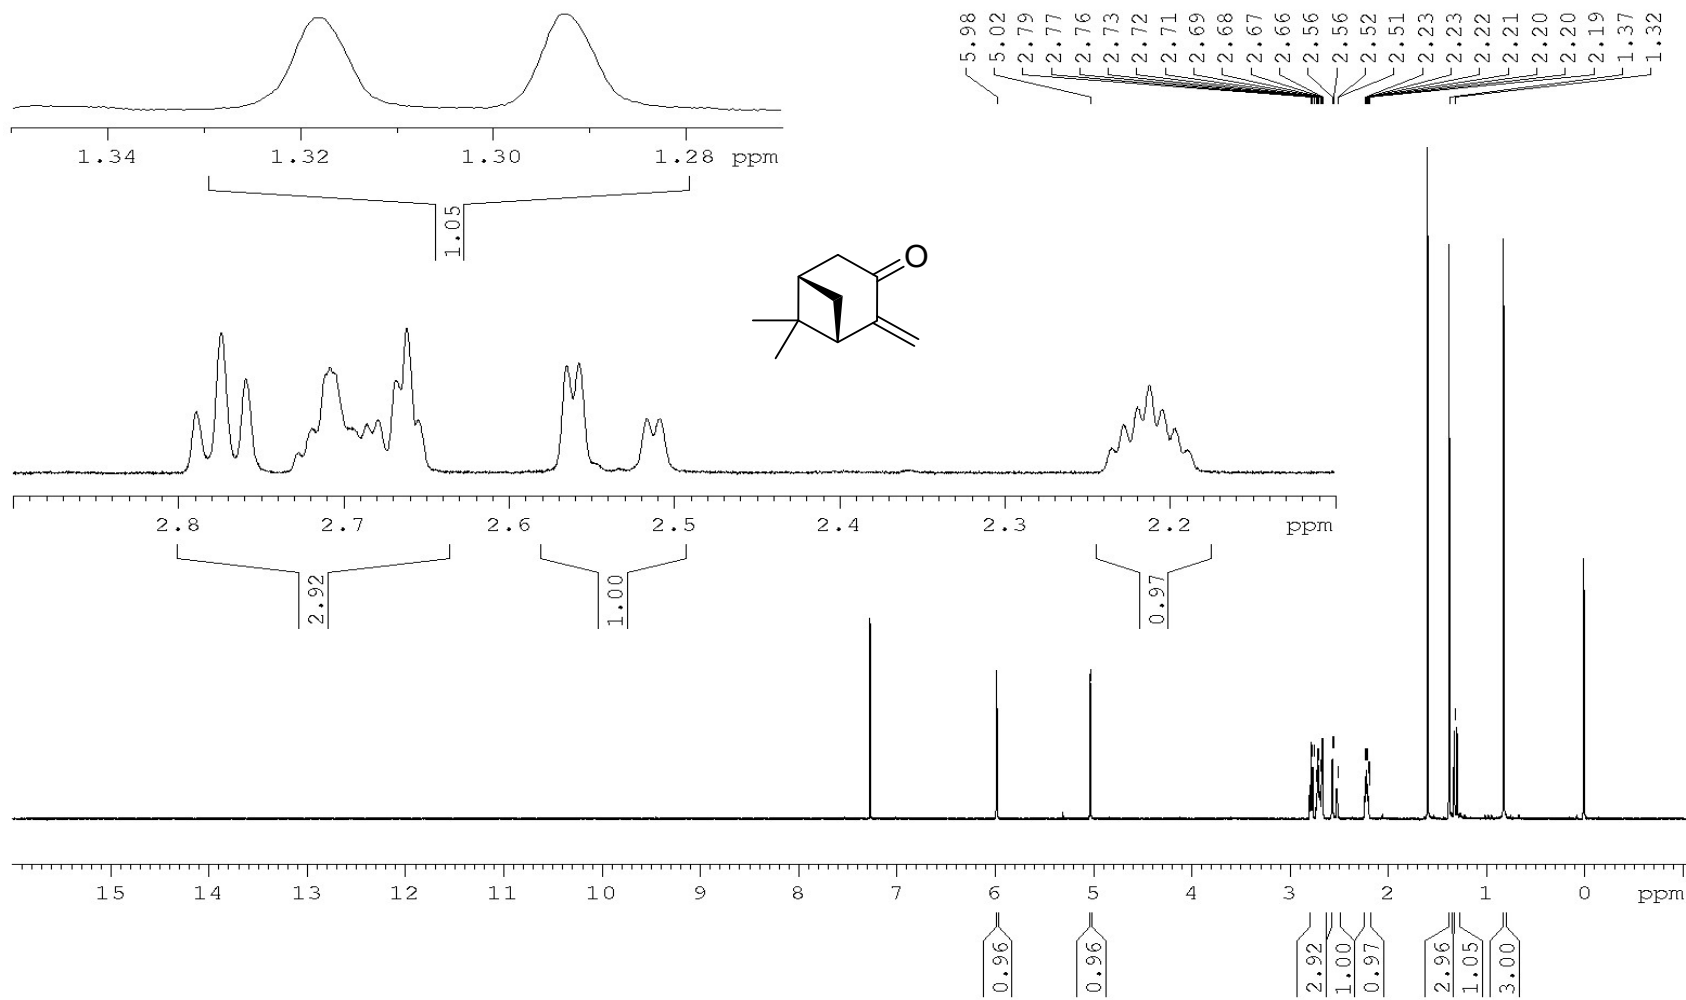

$^1\text{H}$  NMR ( $\text{CDCl}_3$ ) – 400 MHz

S11

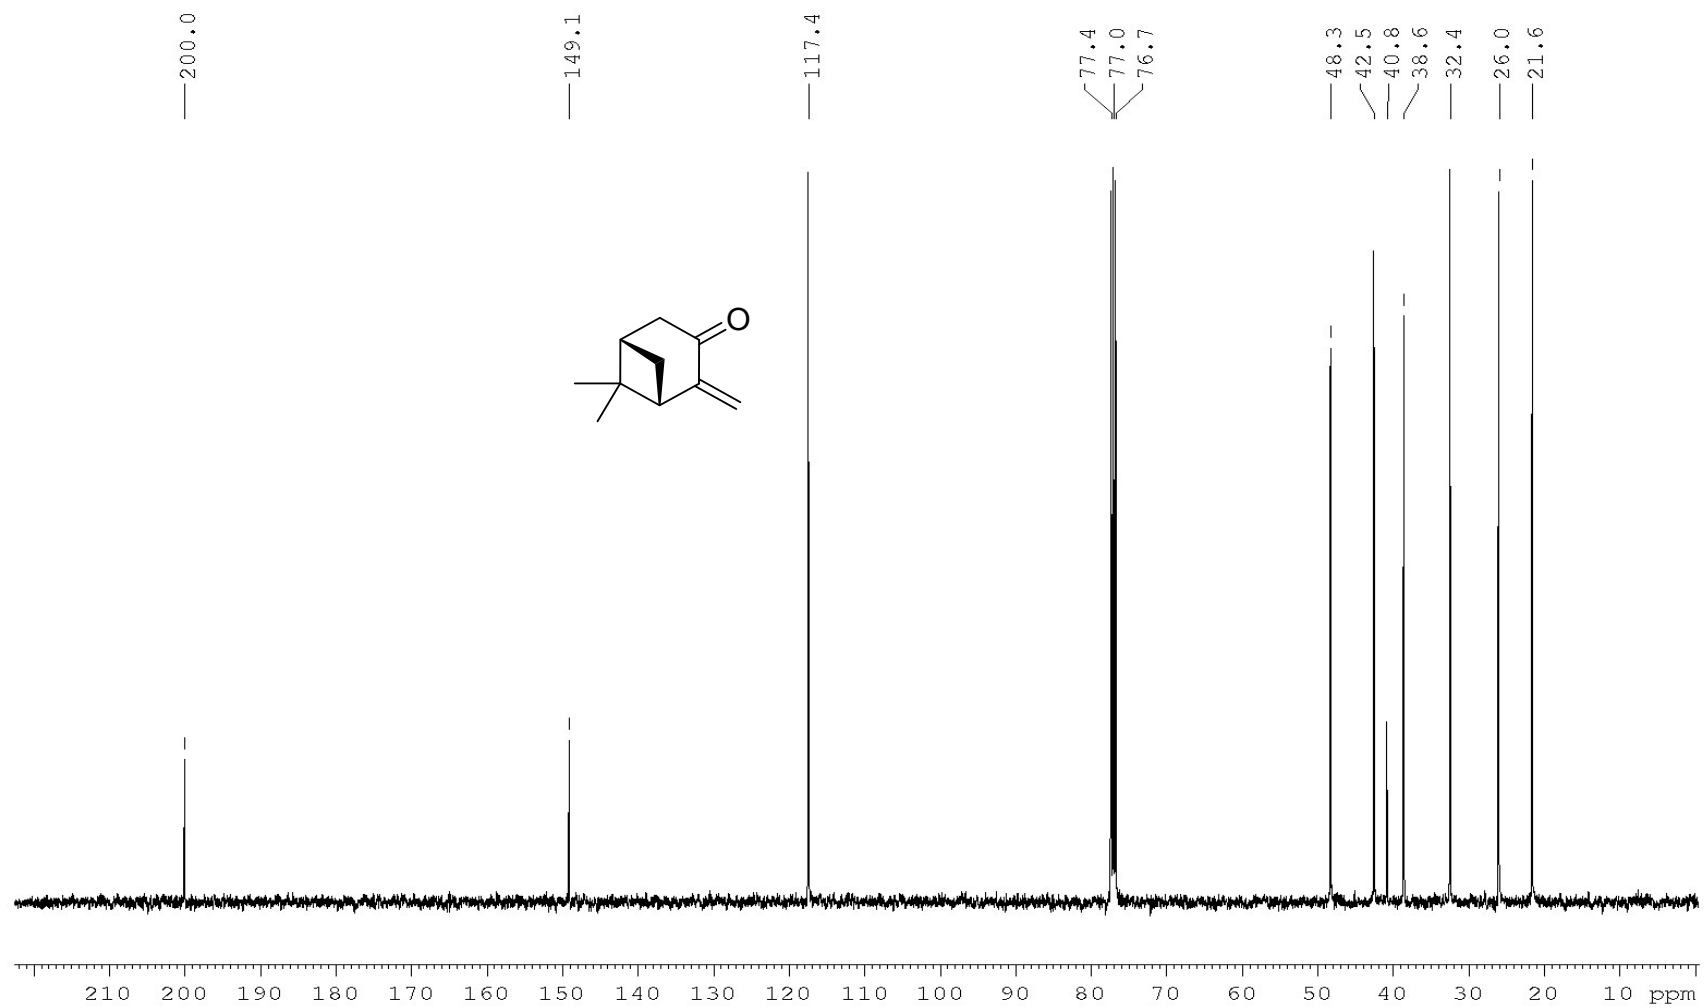

$^{13}\text{C}\{^1\text{H}\}$  NMR (CDCl<sub>3</sub>) – 100 MHz

S12

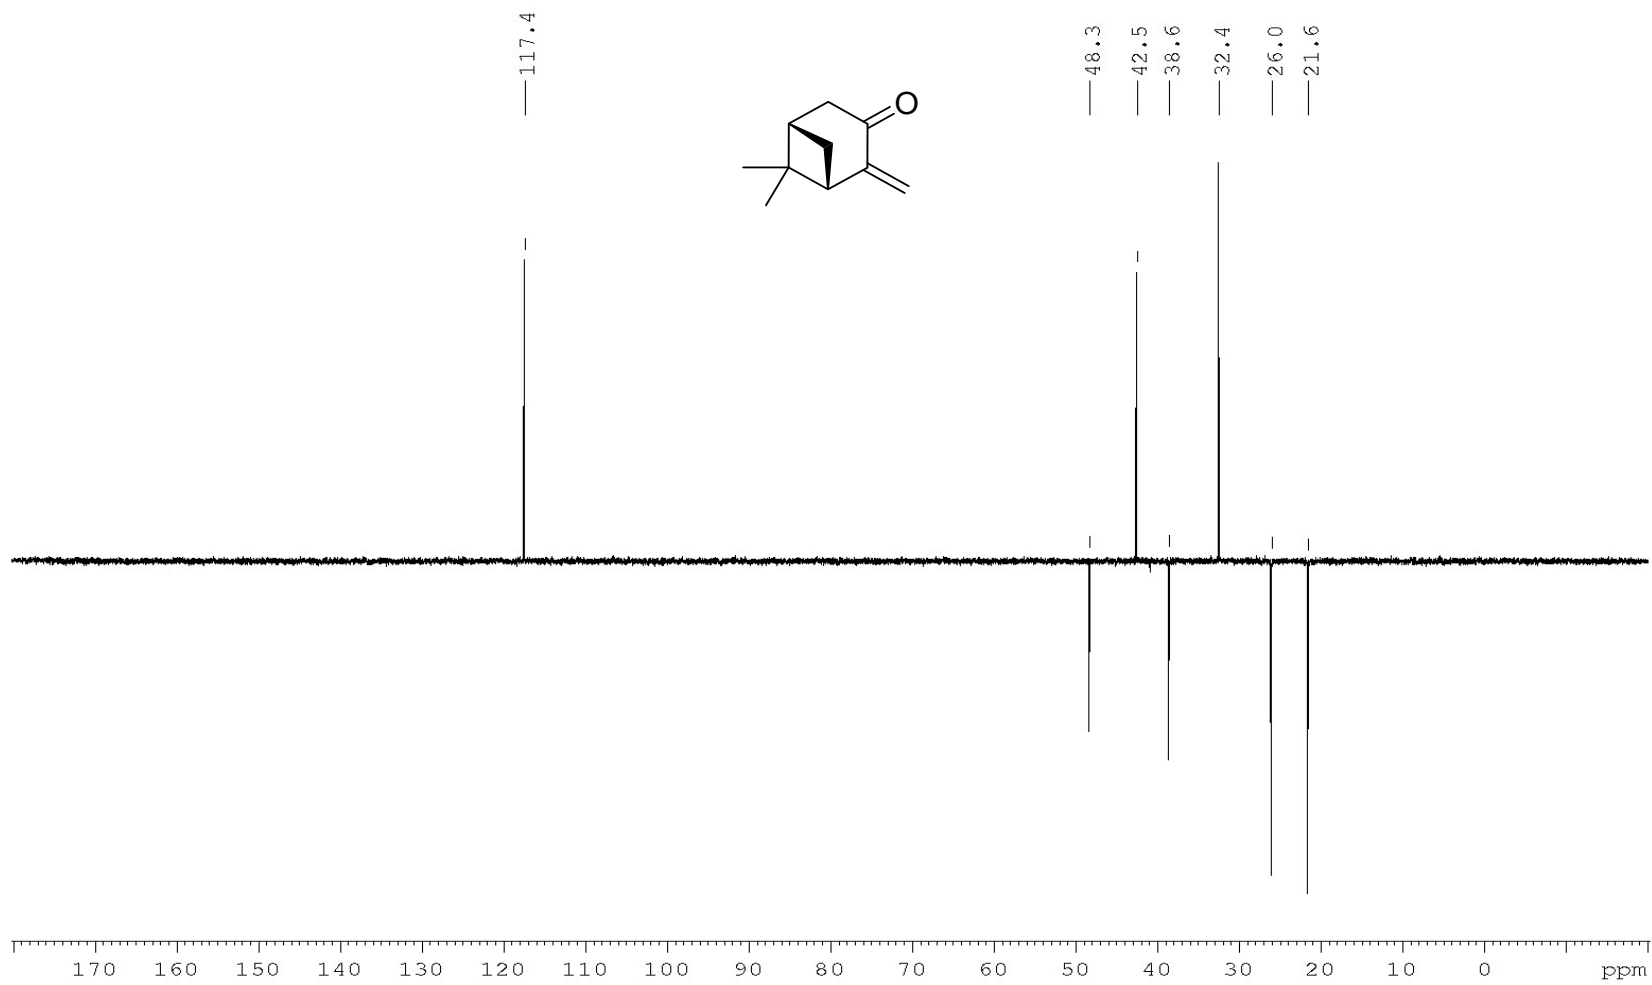

DEPT-135 <sup>13</sup>C NMR (CDCl<sub>3</sub>) – 100 MHz



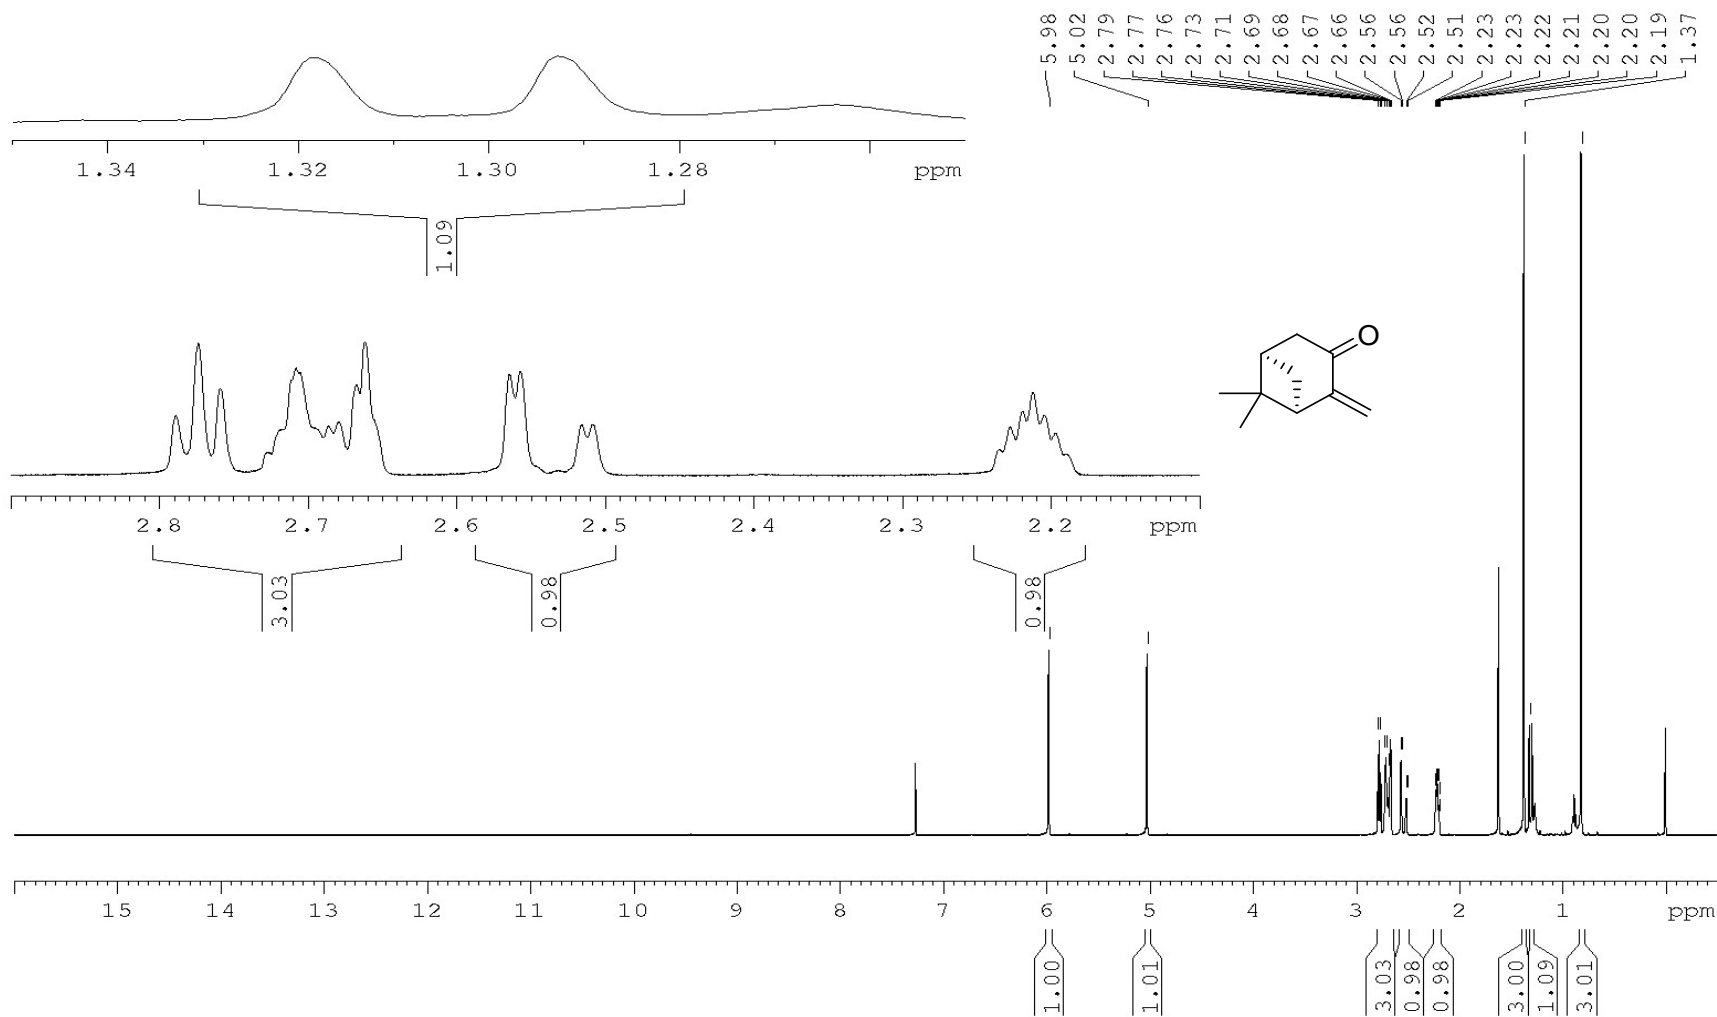

$^1\text{H}$  NMR ( $\text{CDCl}_3$ ) – 400 MHz

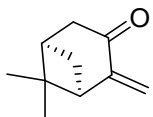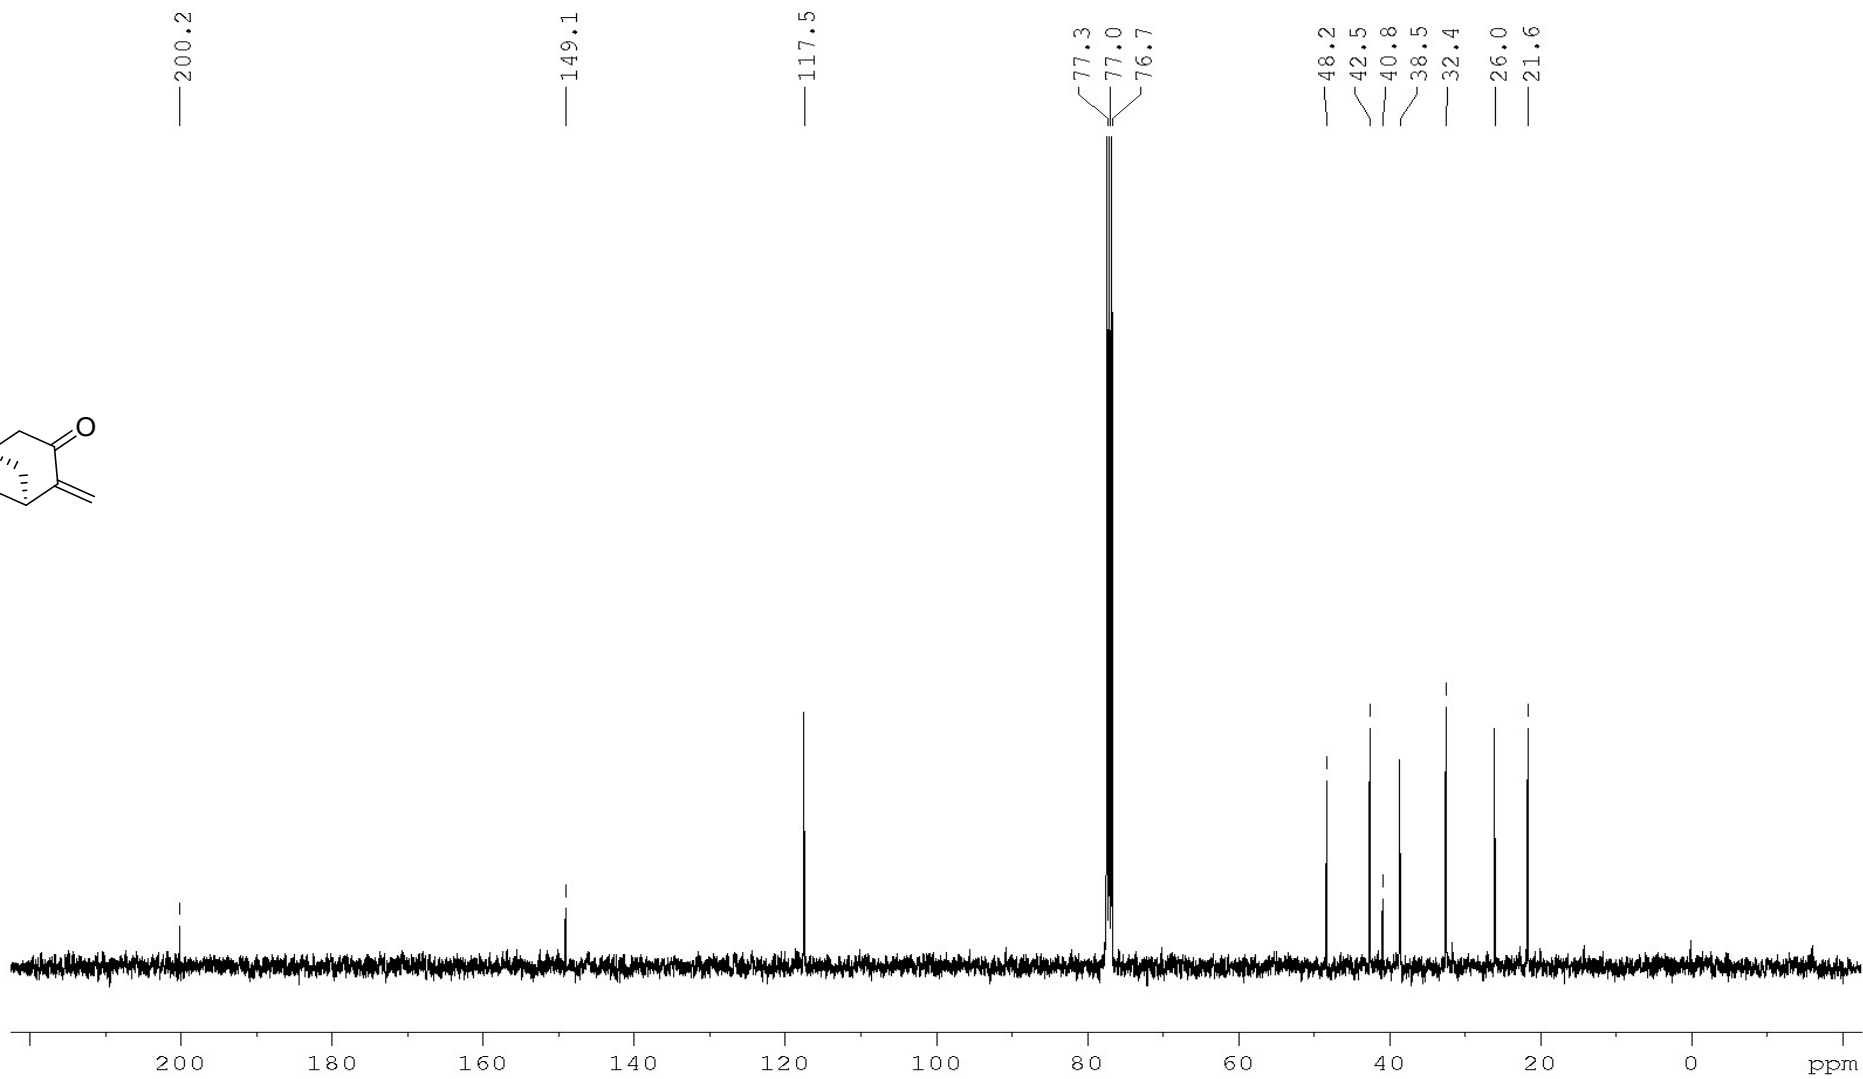

$^{13}\text{C}\{^1\text{H}\}$  NMR ( $\text{CDCl}_3$ ) – 100 MHz

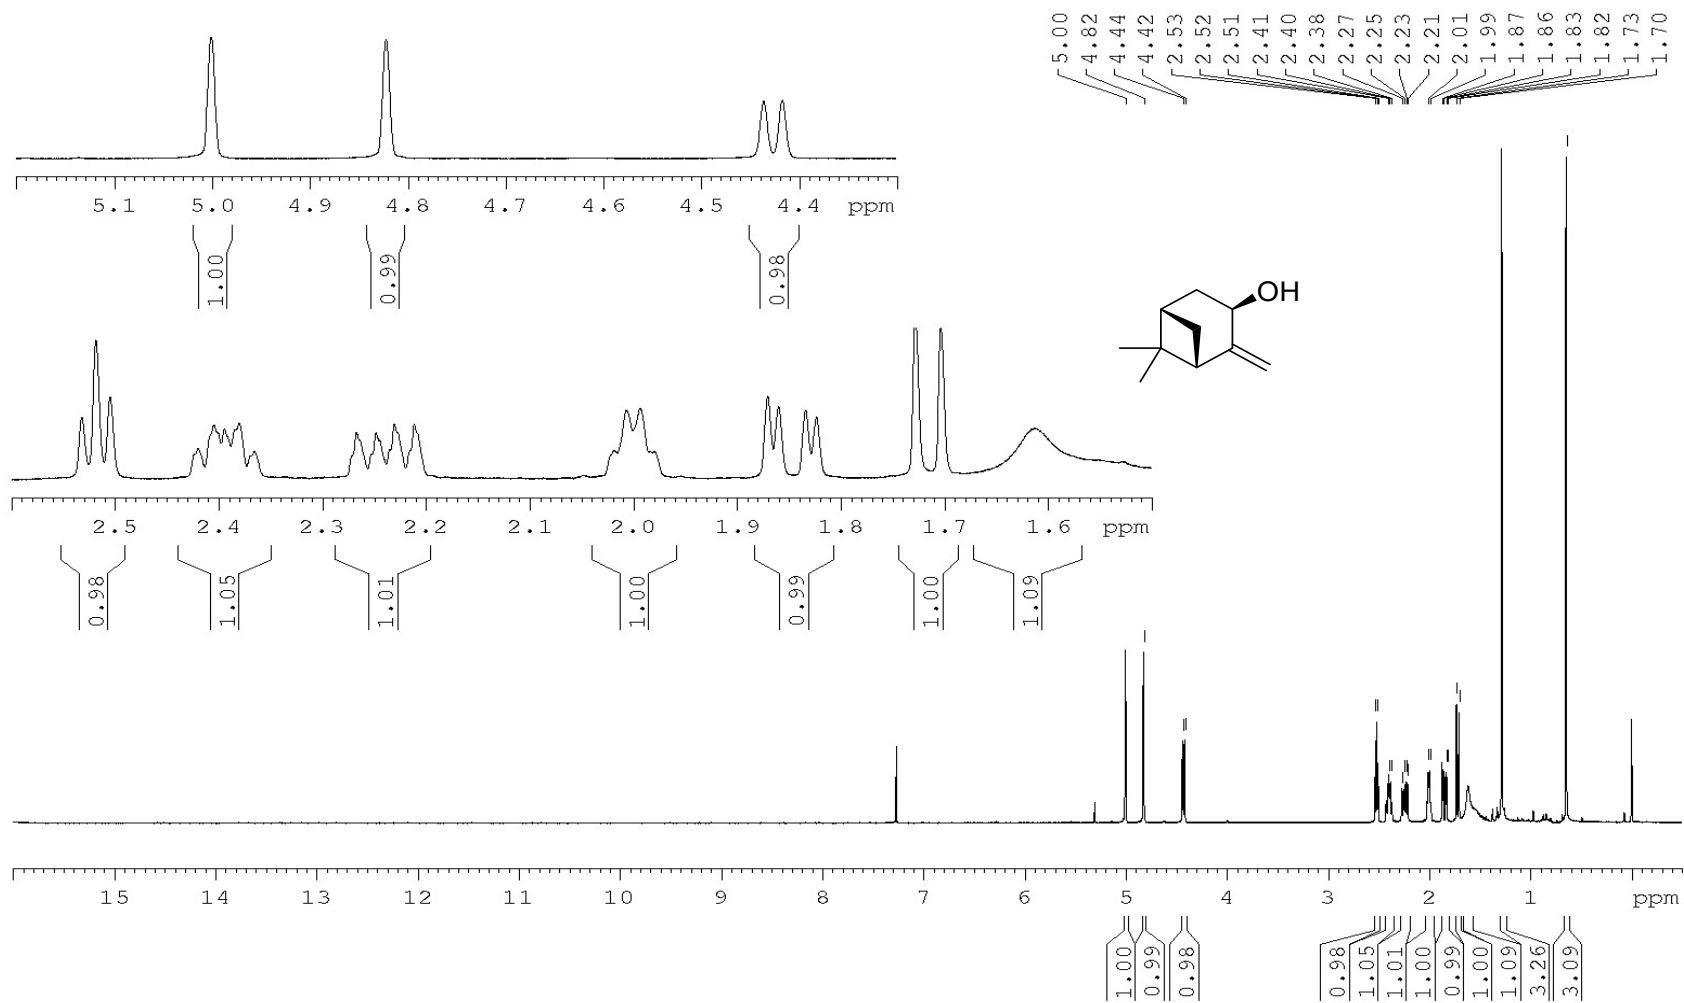

**<sup>1</sup>H NMR (CDCl<sub>3</sub>) – 400 MHz**  
S17

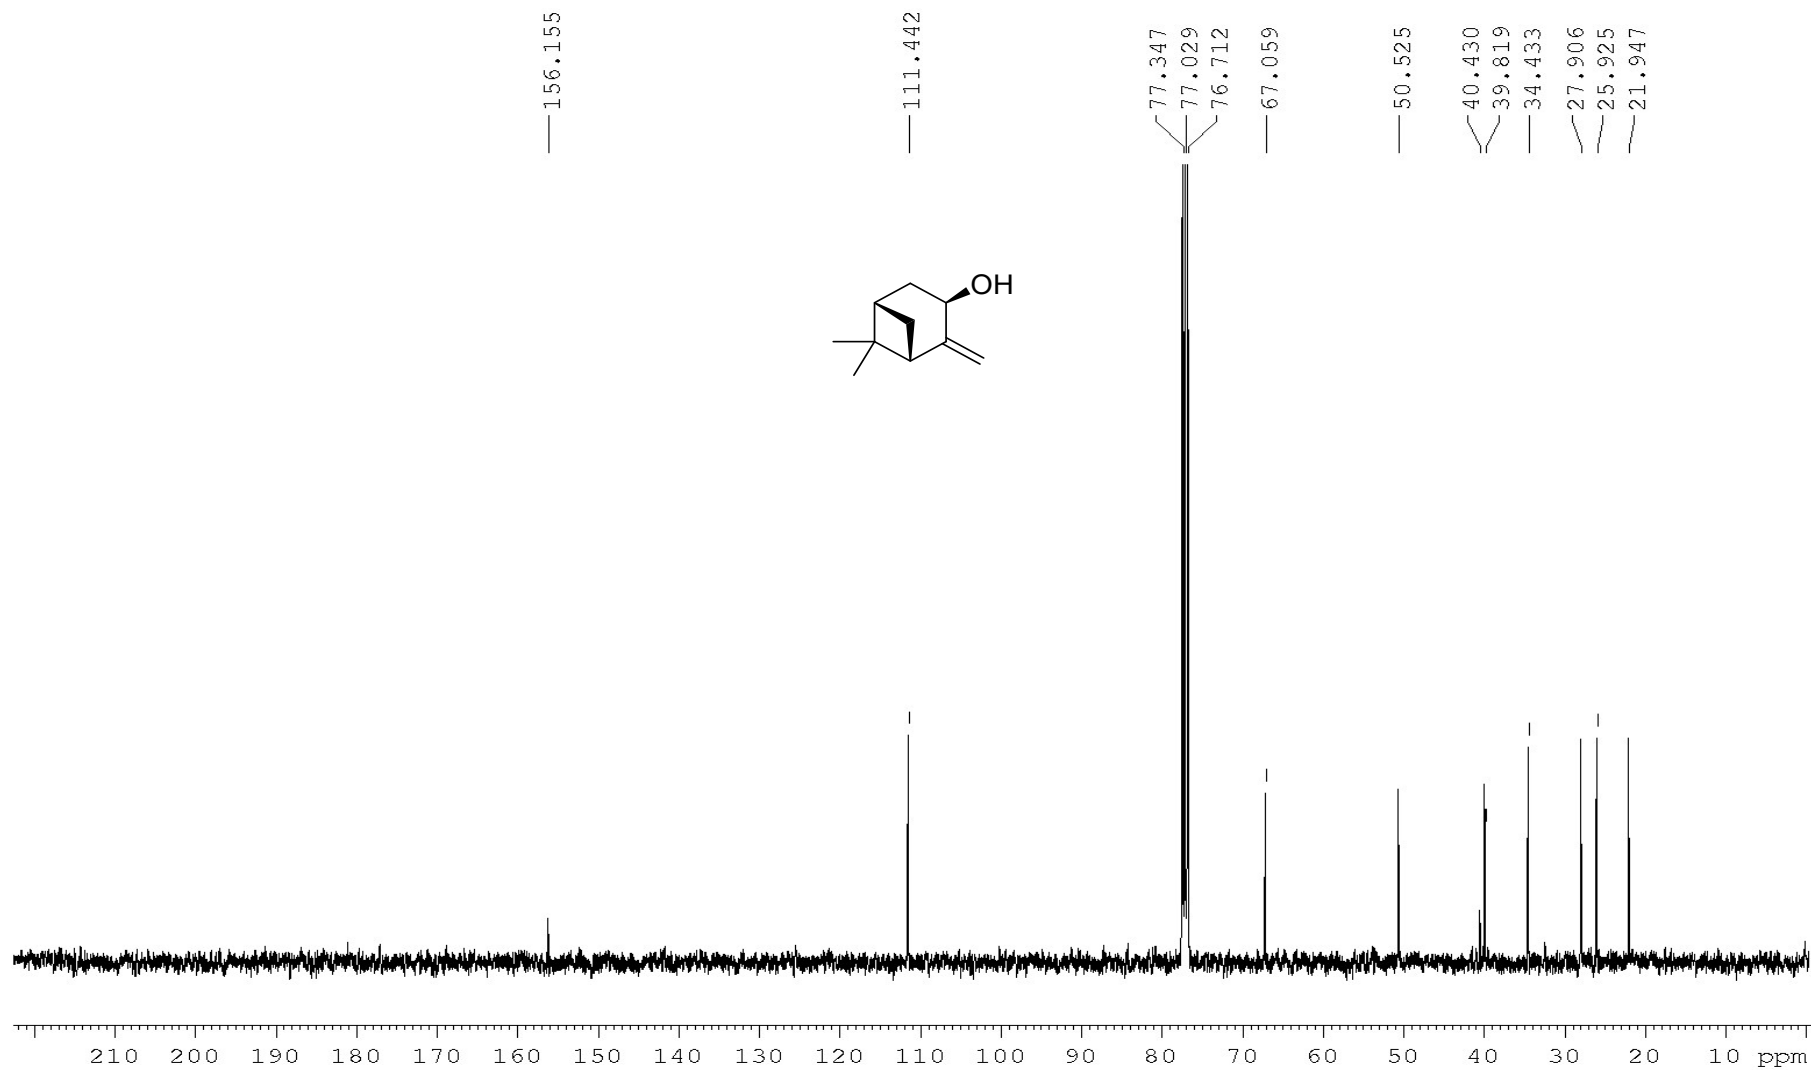

$^{13}\text{C}\{^1\text{H}\}$  NMR (CDCl<sub>3</sub>) – 100 MHz

S18



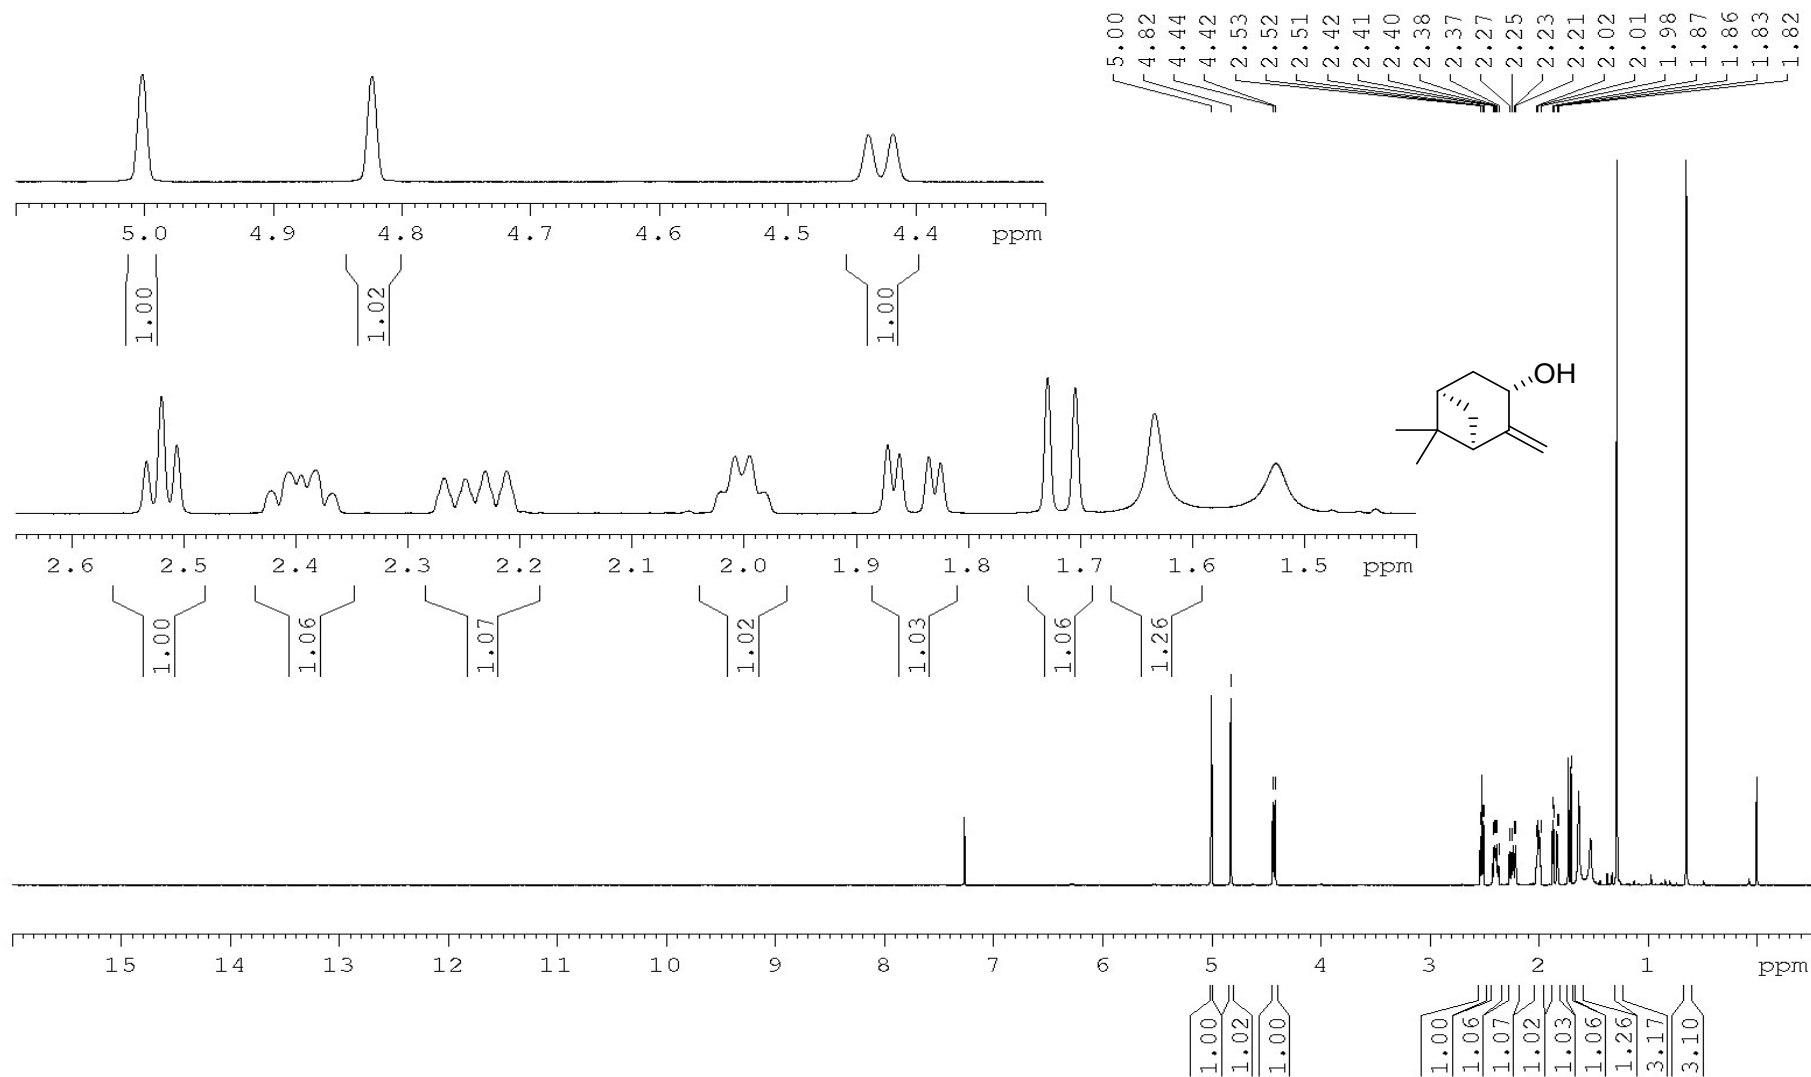

**<sup>1</sup>H NMR (CDCl<sub>3</sub>) – 400 MHz**

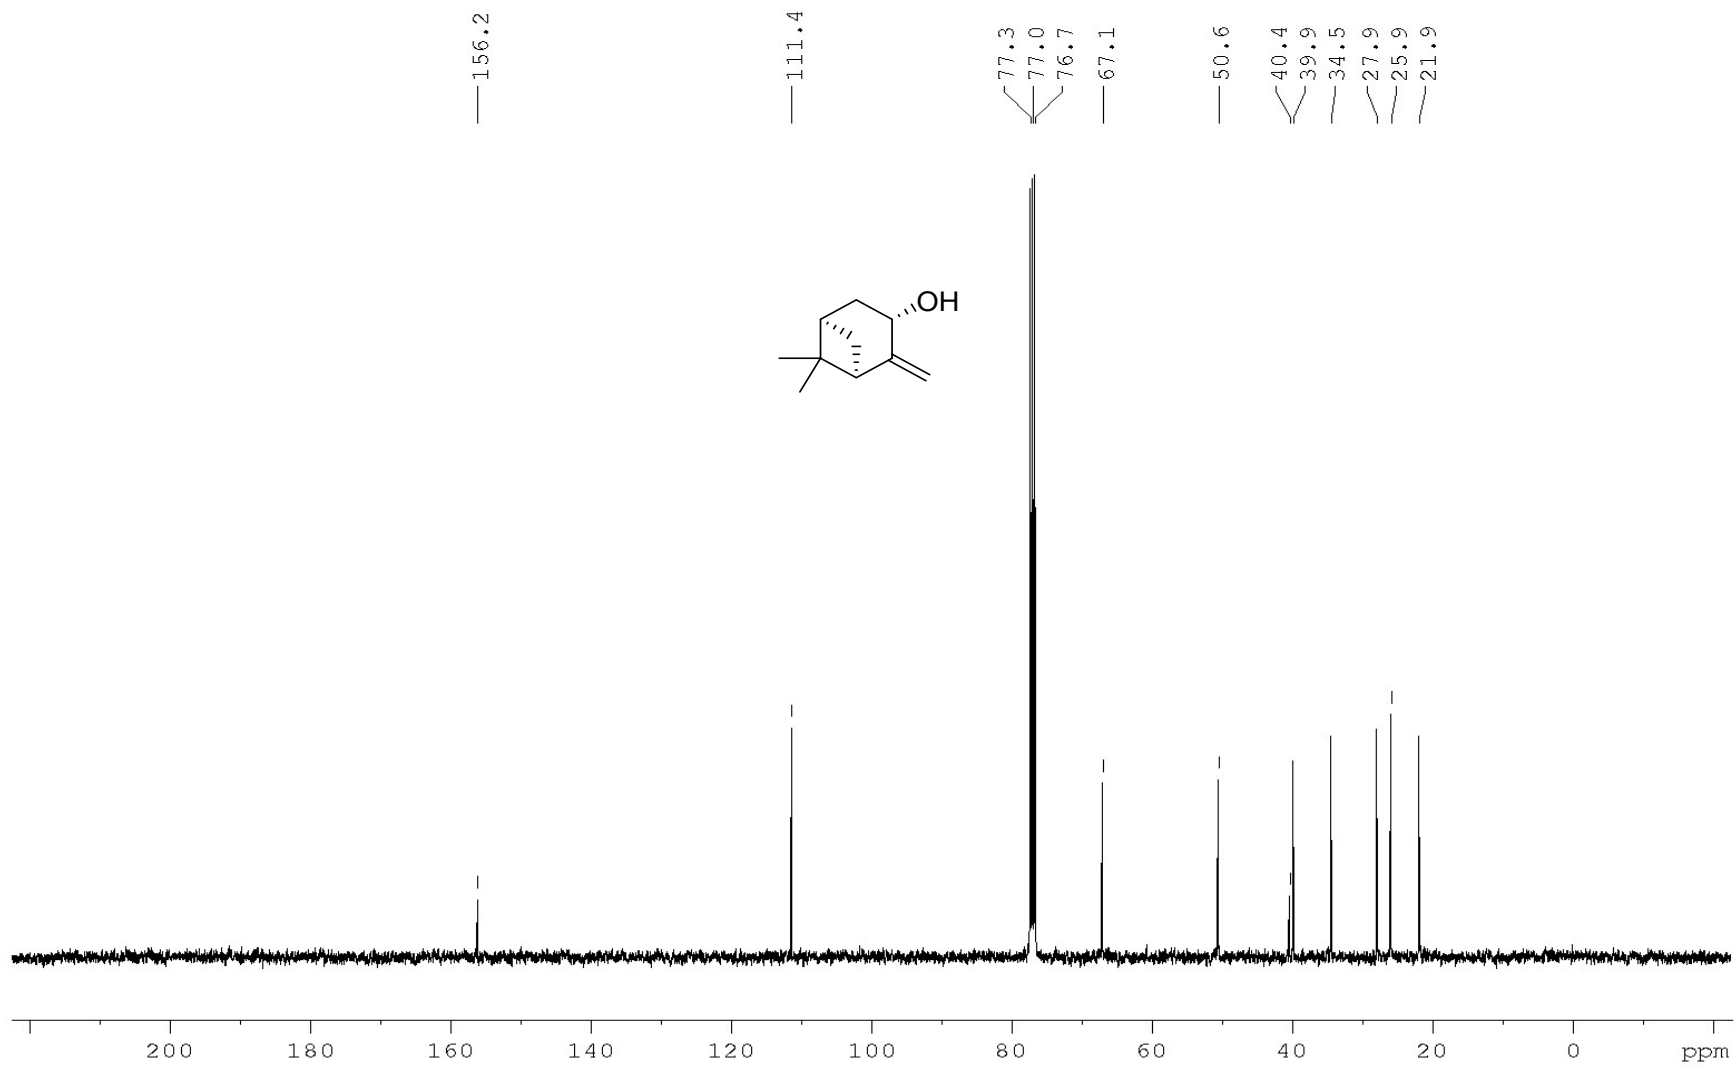

$^{13}\text{C}\{^1\text{H}\}$  NMR ( $\text{CDCl}_3$ ) – 100 MHz

S20

## 6. References

- 1 J. M. De Souza, T. J. Brocksom, D. T. McQuade and K. T. De Oliveira, *J. Org. Chem.*, 2018, **83**, 7574–7585.
- 2 A. A. N. De Souza, N. S. Silva, A. V Müller, A. S. Polo, T. J. Brocksom and K. T. De Oliveira, 2018, **83**, 15077–15086.
- 3 P. B. Cranwell, M. O’Brien, D. L. Browne, P. Koos, A. Polyzos, M. Peña-López and S. V. Ley, *Org. Biomol. Chem.*, 2012, **10**, 5774–5779.
